# Supplementary material for: From two-dimensional networks to three-dimensional metal–organic frameworks mediated by solvent ratio: luminescence and gas adsorption properties
Source: Royal Society of Chemistry journal article supplement (doi:10.1039/d2ce01472f), 2022-12-02
Supplement: d2ce01472f1.pdf [file d2ce01472f1.pdf]

# Electronic Supplementary Information

## From two-dimensional networks to three-dimensional metal-organic frameworks mediated by solvent ratio: Luminescence and gas adsorption properties

Jia-Ling Yin, Meng-Ru Yin and Guo-Ping Yong\*

Department of Chemistry, University of Science and Technology of China, Hefei 230026, P. R. China. E-mail: gpyong@ustc.edu.cn

**Table S1** Selected bond distances (Å) and angles (°) for **1–3**.<sup>a</sup>

| <b>1</b>            |          | <b>2</b>          |            | <b>3</b>              |            |
|---------------------|----------|-------------------|------------|-----------------------|------------|
| Co(1)-O(1)          | 2.004(7) | Co(1)-O(1)        | 2.049(3)   | Co(1)-O(1)            | 2.0458(18) |
| Co(1)-O(1)#2        | 2.004(7) | Co(1)-O(3)        | 2.050(3)   | Co(1)-O(2)#15         | 2.1240(18) |
| Co(1)-N(3)          | 2.229(8) | Co(1)-O(6)        | 2.071(3)   | Co(1)-O(3)            | 2.170(2)   |
| Co(1)-N(3)#2        | 2.229(8) | Co(1)-N(3)        | 2.213(3)   | Co(1)-O(6)            | 2.1072(19) |
| Co(1)-N(8)          | 2.218(7) | Co(1)-N(4)#2      | 2.154(3)   | Co(1)-N(3)            | 2.192(2)   |
| Co(1)-N(8)#2        | 2.218(7) | Co(1)-N(7)        | 2.223(3)   | Co(1)-N(4)#10         | 2.121(2)   |
| Co(2)-O(3)          | 1.998(7) | Co(2)-O(2)        | 2.139(2)   | O(1)-Co(1)-O(2)#15    | 91.97(7)   |
| Co(2)-O(3)#2        | 1.998(7) | Co(2)-O(2)#2      | 2.139(2)   | O(1)-Co(1)-O(3)       | 93.48(9)   |
| Co(2)-N(4)          | 2.234(8) | Co(2)-O(5)        | 2.056(3)   | O(1)-Co(1)-O(6)       | 86.51(8)   |
| Co(2)-N(4)#2        | 2.234(8) | Co(2)-O(5)#2      | 2.056(3)   | O(1)-Co(1)-N(3)       | 77.92(7)   |
| Co(2)-N(7)          | 2.258(8) | Co(2)-N(8)        | 2.193(3)   | O(1)-Co(1)-N(4)#10    | 173.39(8)  |
| Co(2)-N(7)#2        | 2.258(8) | Co(2)-N(8)#2      | 2.193(3)   | O(2)#15-Co(1)-O(3)    | 173.30(9)  |
| O(1)-Co(1)-O(1)#2   | 180.0    | O(1)-Co(1)-O(3)   | 87.34(13)  | O(2)#15-Co(1)-O(6)    | 94.17(8)   |
| O(1)-Co(1)-N(3)     | 79.8(3)  | O(1)-Co(1)-O(6)   | 97.36(13)  | O(2)#15-Co(1)-N(3)    | 91.17(7)   |
| O(1)-Co(1)-N(3)#2   | 100.2(3) | O(1)-Co(1)-N(3)   | 76.92(11)  | O(2)#15-Co(1)-N(4)#10 | 88.21(8)   |
| O(1)-Co(1)-N(8)     | 90.5(3)  | O(1)-Co(1)-N(4)#2 | 171.15(12) | O(3)-Co(1)-O(6)       | 90.06(9)   |
| O(1)-Co(1)-N(8)#2   | 89.5(3)  | O(1)-Co(1)-N(7)   | 84.21(11)  | O(3)-Co(1)-N(3)       | 86.16(8)   |
| O(1)#2-Co(1)-N(3)   | 100.2(3) | O(3)-Co(1)-O(6)   | 175.24(12) | O(3)-Co(1)-N(4)#10    | 86.84(9)   |
| O(1)#2-Co(1)-N(3)#2 | 79.8(3)  | O(3)-Co(1)-N(3)   | 90.13(11)  | O(6)-Co(1)-N(3)       | 163.70(8)  |
| O(1)#2-Co(1)-N(8)   | 89.5(3)  | O(3)-Co(1)-N(4)#2 | 88.87(12)  | O(6)-Co(1)-N(4)#10    | 86.89(8)   |

|                     |          |                     |            |                    |           |
|---------------------|----------|---------------------|------------|--------------------|-----------|
| O(1)#2-Co(1)-N(8)#2 | 90.5(3)  | O(3)-Co(1)-N(7)     | 78.75(11)  | N(3)-Co(1)-N(4)#10 | 108.68(8) |
| N(3)-Co(1)-N(3)#2   | 180.0    | O(6)-Co(1)-N(3)     | 91.68(12)  |                    |           |
| N(3)-Co(1)-N(8)     | 98.5(3)  | O(6)-Co(1)-N(4)#2   | 86.37(12)  |                    |           |
| N(3)-Co(1)-N(8)#2   | 81.5(3)  | O(6)-Co(1)-N(7)     | 100.88(11) |                    |           |
| N(3)#2-Co(1)-N(8)   | 81.5(3)  | N(3)-Co(1)-N(4)#2   | 111.10(11) |                    |           |
| N(3)#2-Co(1)-N(8)#2 | 98.5(3)  | N(3)-Co(1)-N(7)     | 158.54(11) |                    |           |
| N(8)-Co(1)-N(8)#2   | 180.0    | N(4)#2-Co(1)-N(7)   | 87.21(11)  |                    |           |
| O(3)-Co(2)-O(3)#2   | 180.0(4) | O(2)-Co(2)-O(2)#2   | 180.0      |                    |           |
| O(3)-Co(2)-N(4)     | 92.0(3)  | O(2)-Co(2)-O(5)     | 86.65(11)  |                    |           |
| O(3)-Co(2)-N(4)#2   | 88.0(3)  | O(2)-Co(2)-O(5)#2   | 93.35(11)  |                    |           |
| O(3)-Co(2)-N(7)     | 78.2(3)  | O(2)-Co(2)-N(8)     | 92.08(11)  |                    |           |
| O(3)-Co(2)-N(7)#2   | 101.9(3) | O(2)-Co(2)-N(8)#2   | 87.92(11)  |                    |           |
| O(3)#2-Co(2)-N(4)   | 88.0(3)  | O(2)#2-Co(2)-O(5)   | 93.35(11)  |                    |           |
| O(3)#2-Co(2)-N(4)#2 | 92.0(3)  | O(2)#2-Co(2)-O(5)#2 | 86.65(11)  |                    |           |
| O(3)#2-Co(2)-N(7)   | 101.8(3) | O(2)#2-Co(2)-N(8)   | 87.92(11)  |                    |           |
| O(3)#2-Co(2)-N(7)#2 | 78.1(3)  | O(2)#2-Co(2)-N(8)#2 | 92.08(11)  |                    |           |
| N(4)-Co(2)-N(4)#2   | 180.0    | O(5)-Co(2)-O(5)#2   | 180.0      |                    |           |
| N(4)-Co(2)-N(7)     | 85.3(3)  | O(5)-Co(2)-N(8)     | 93.19(12)  |                    |           |
| N(4)-Co(2)-N(7)#2   | 94.8(3)  | O(5)-Co(2)-N(8)#2   | 86.81(12)  |                    |           |
| N(4)#2-Co(2)-N(7)   | 94.8(3)  | O(5)#2-Co(2)-N(8)   | 86.81(12)  |                    |           |
| N(4)#2-Co(2)-N(7)#2 | 85.2(3)  | O(5)#2-Co(2)-N(8)#2 | 93.19(12)  |                    |           |
| N(7)-Co(2)-N(7)#2   | 180.0    | N(8)-Co(2)-N(8)#2   | 180.0      |                    |           |

<sup>a</sup> Symmetry code for **1** and **2**: #2= -x, -y, -z; symmetry code for **3**: #10= -x, -y, -z, #15= x-y+2/3, x+1/3, -z+1/3.

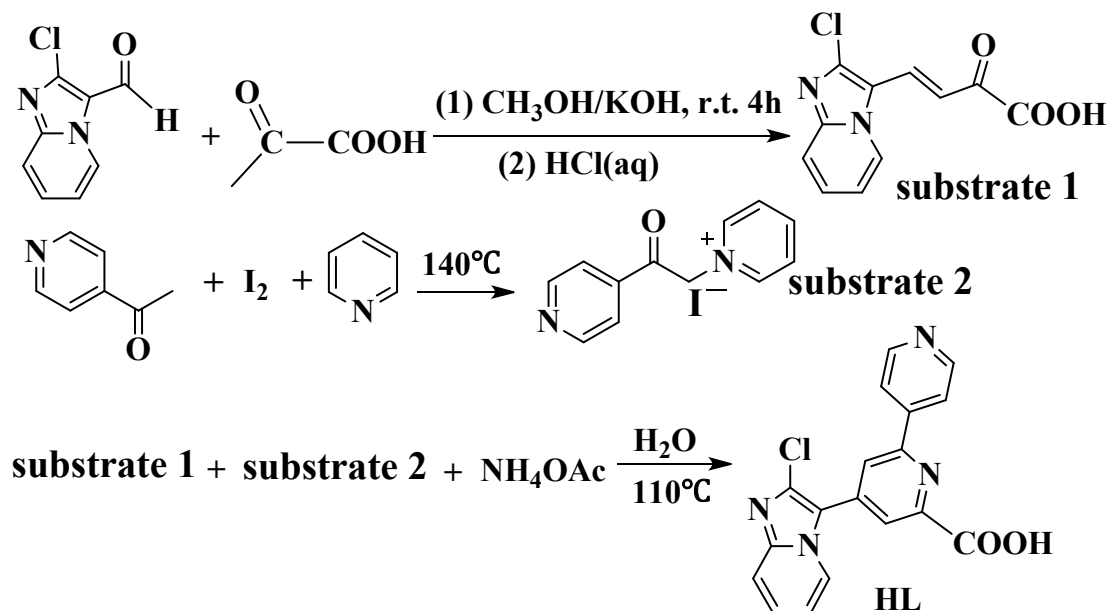

**Scheme S1** The synthesis procedure for HL ligand.

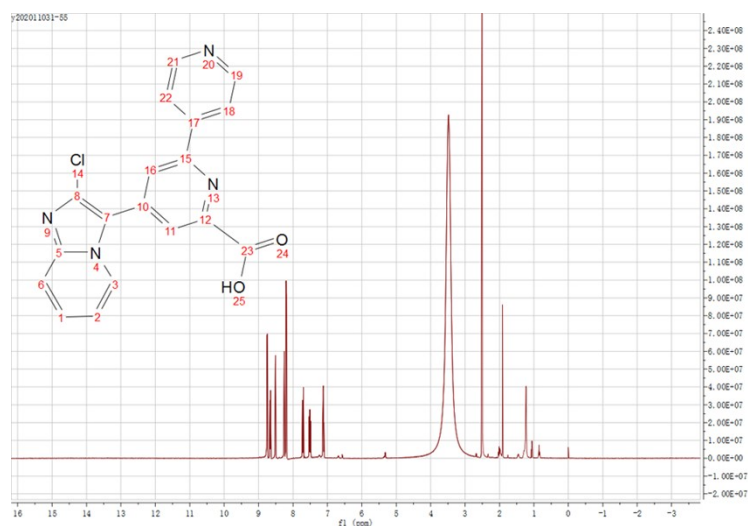

**Fig. S1**  $^1\text{H}$  NMR (400 MHz,  $\text{dms0-d}_6$ ) of HL ligand.

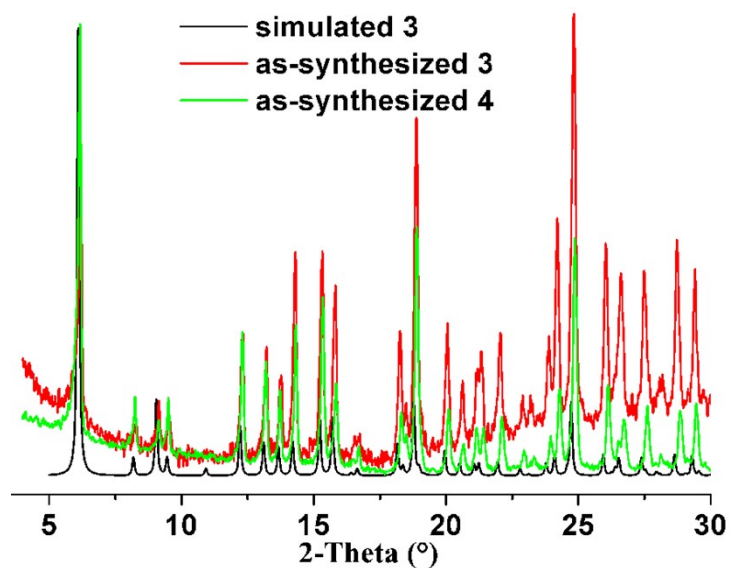

**Fig. S2** Powder XRD profiles of 3 and 4.

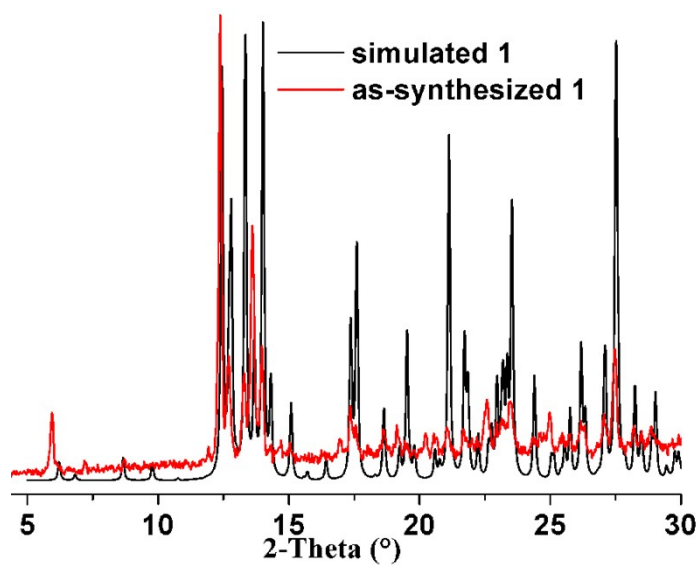

**Fig. S3** Powder XRD profiles of 1.

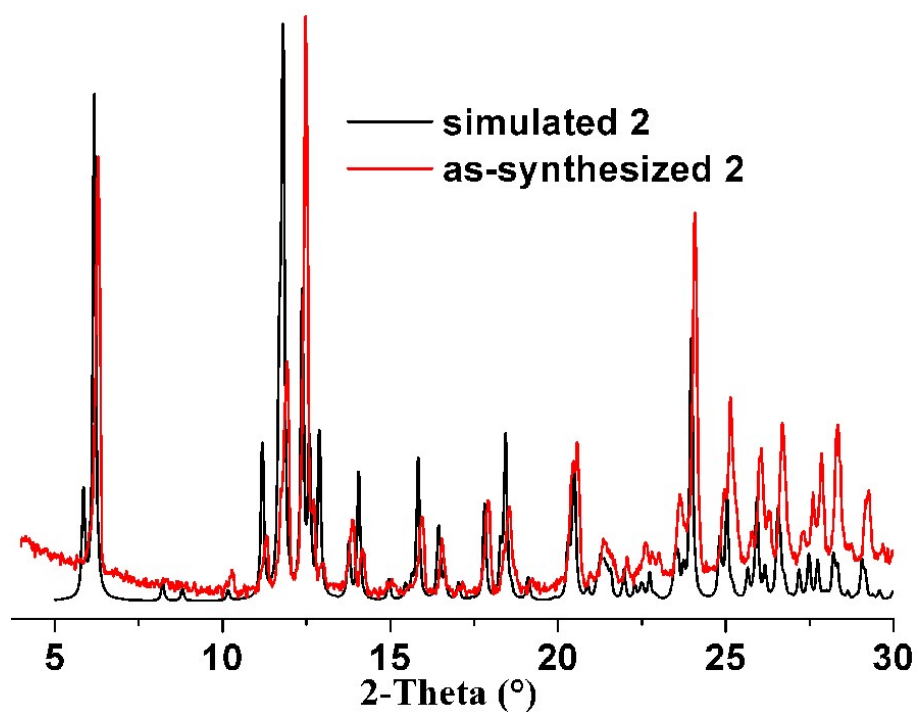

Fig. S4 Powder XRD profiles of 2.

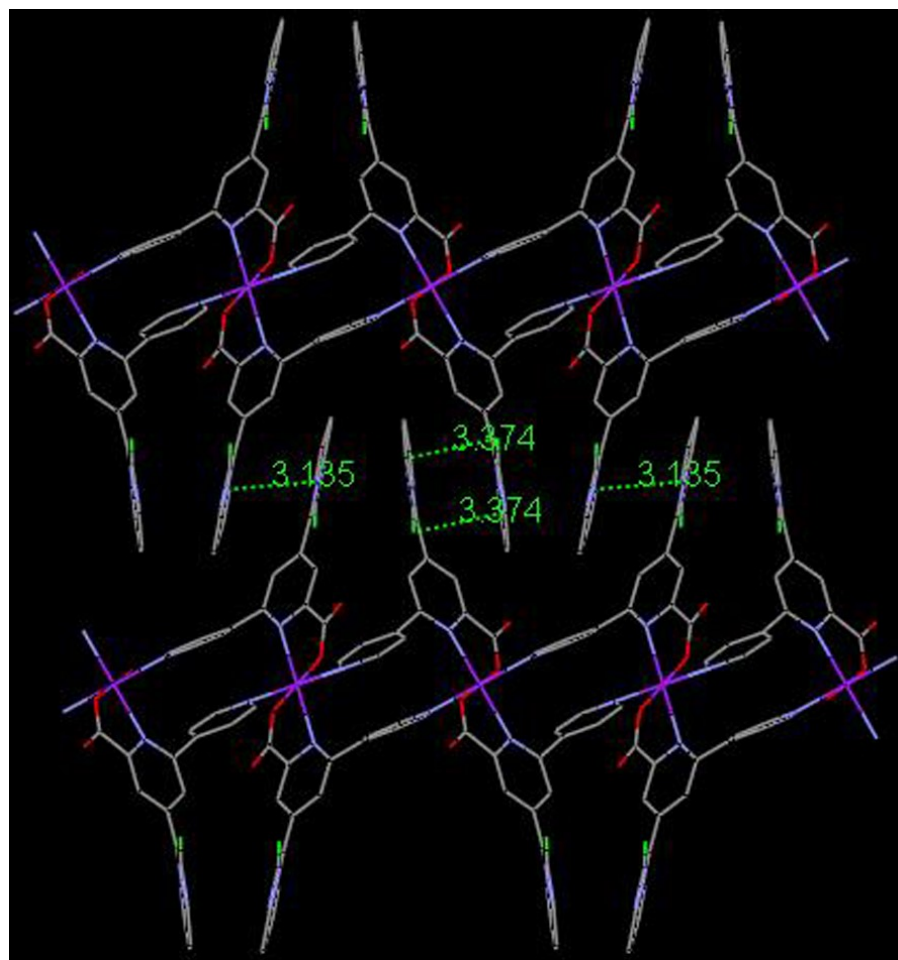

Fig. S5 The 3D supramolecular structure of 1.

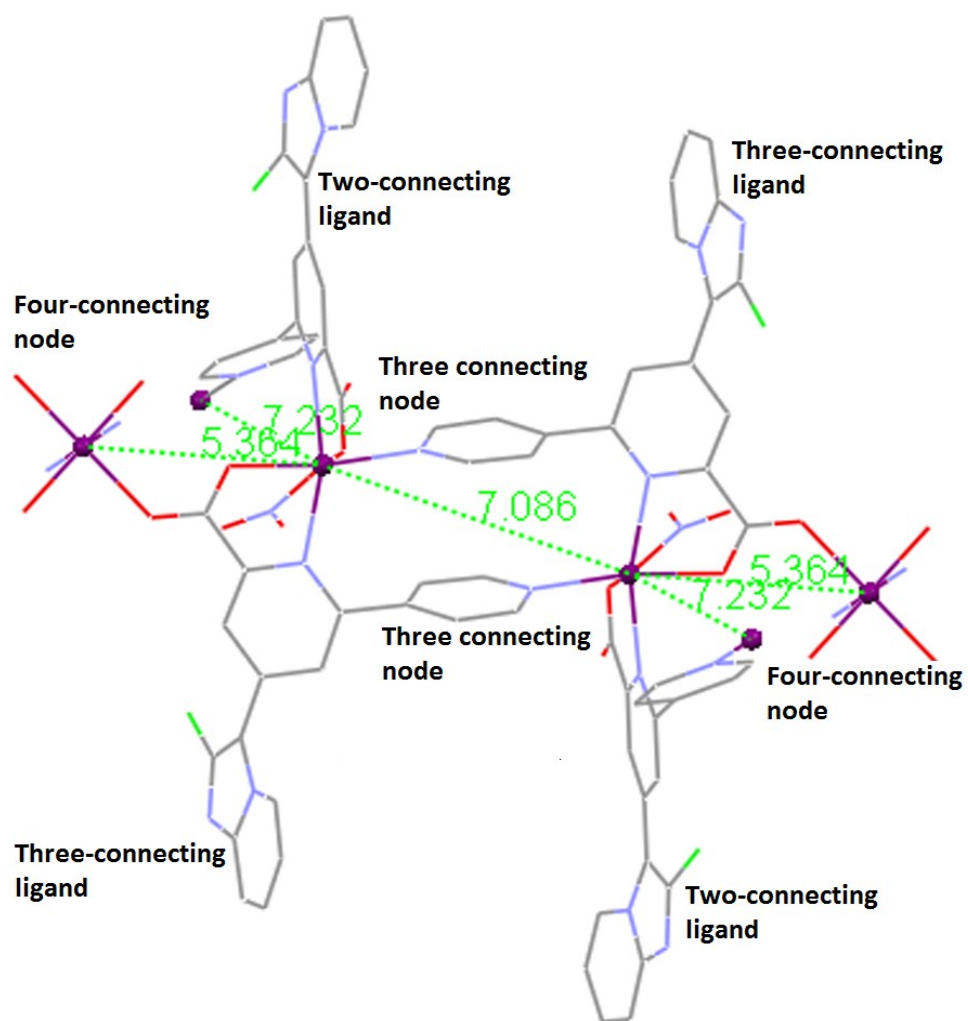

**Fig. S6** The two- and three-connecting ligands in **2**.

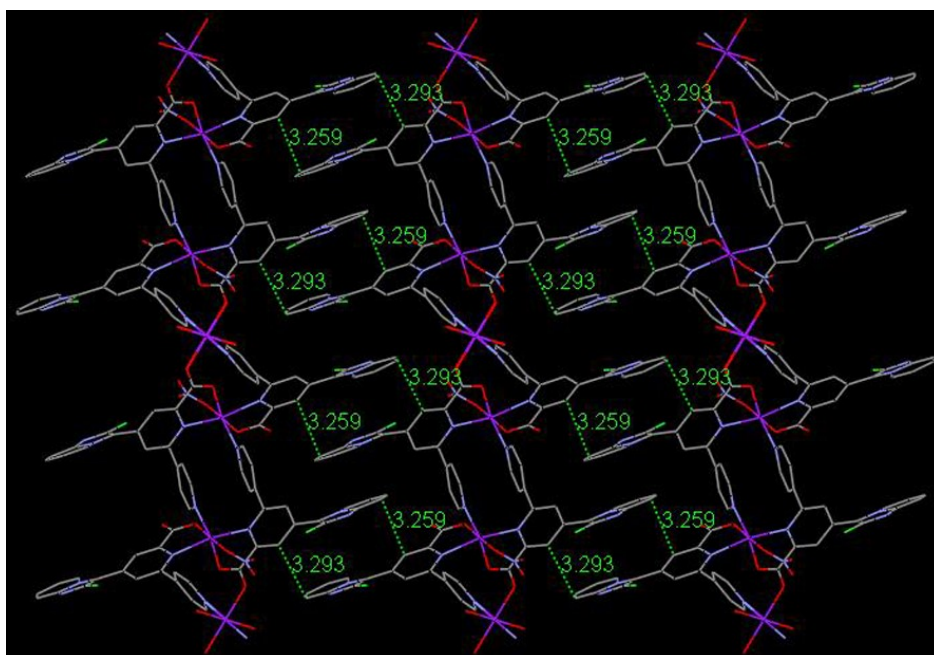

**Fig. S7** The 3D supramolecular structure of **2**.

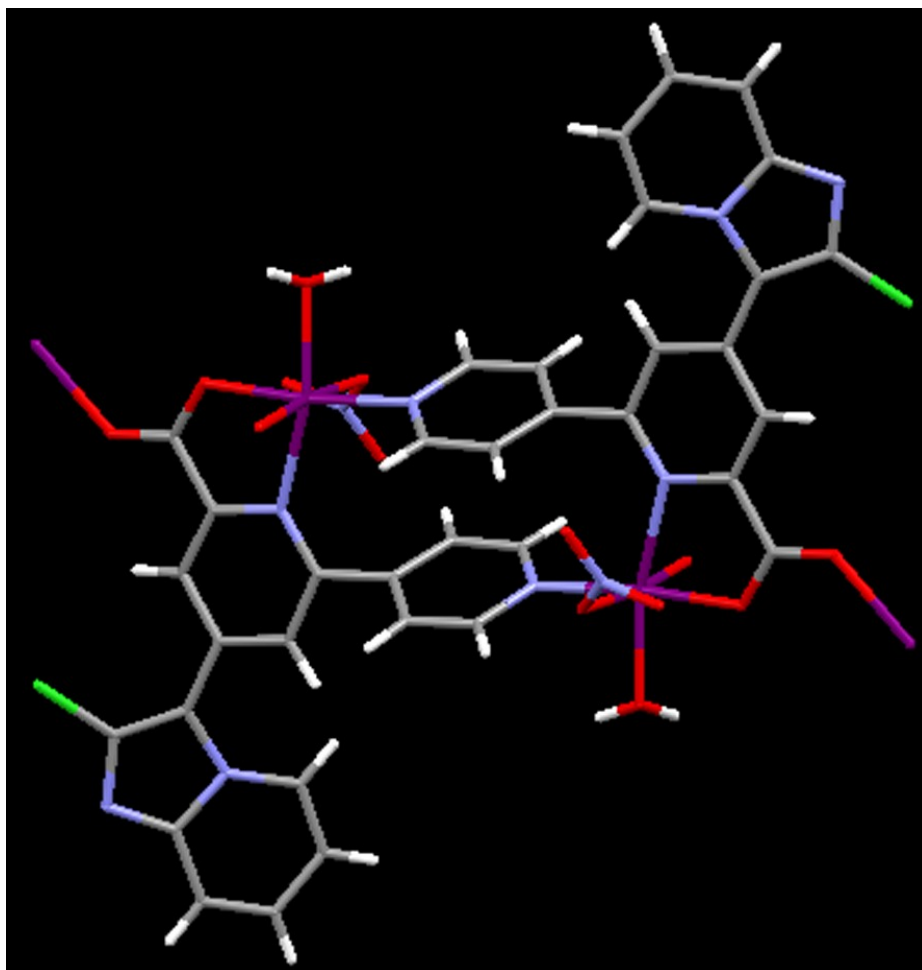

**Fig. S8** The quasi-rectangular SBU in **3**.

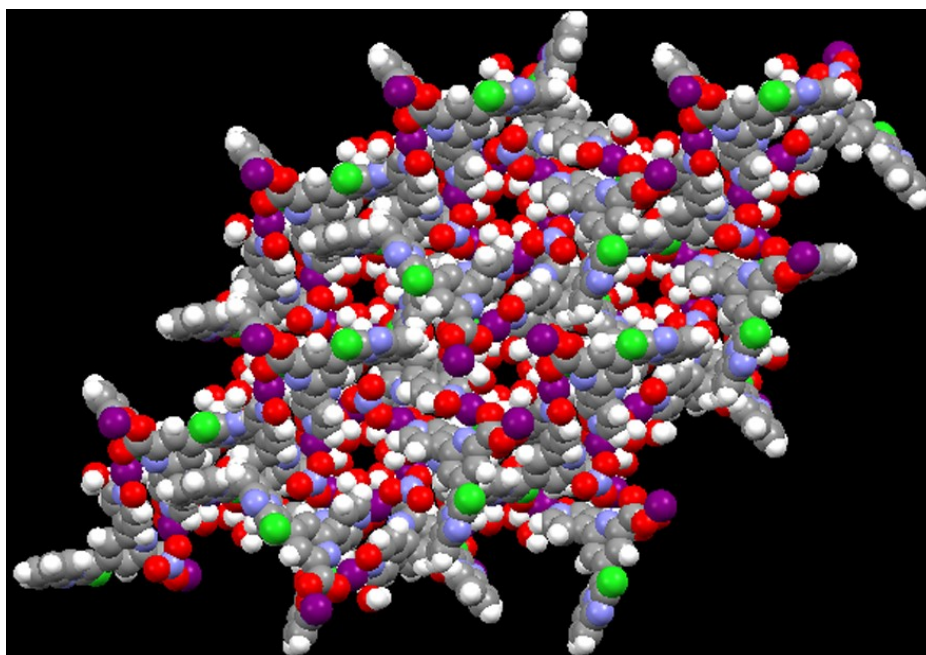

**Fig. S9** Space-filling representation of **3**, showing guest-free small hexagonal channels.

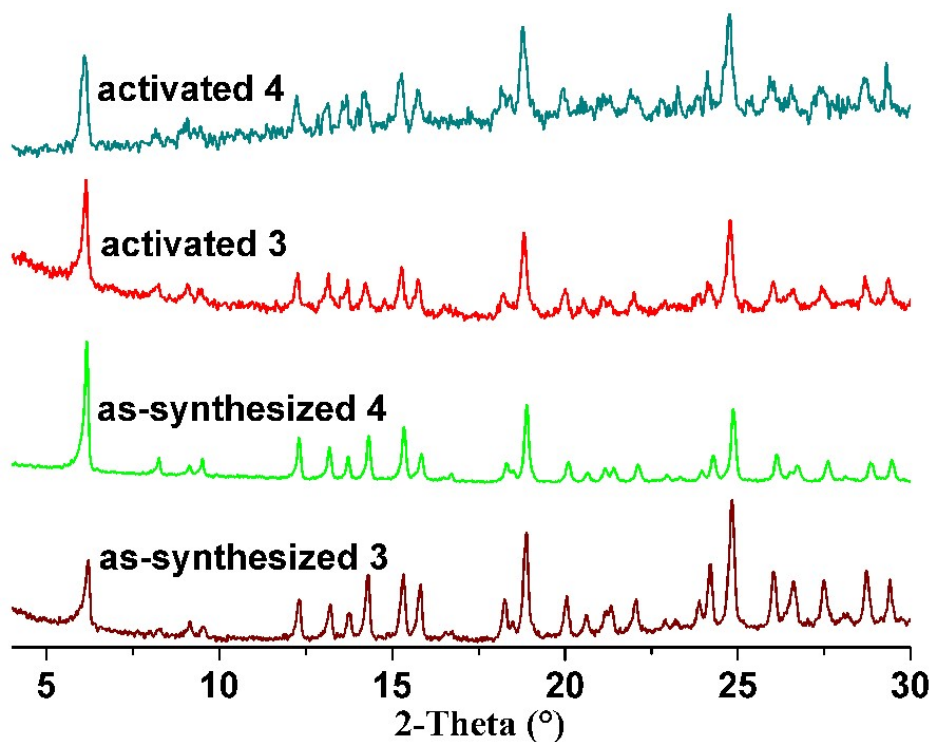

Fig. S10 Powder XRD profiles of as-synthesized and activated 3 and 4.

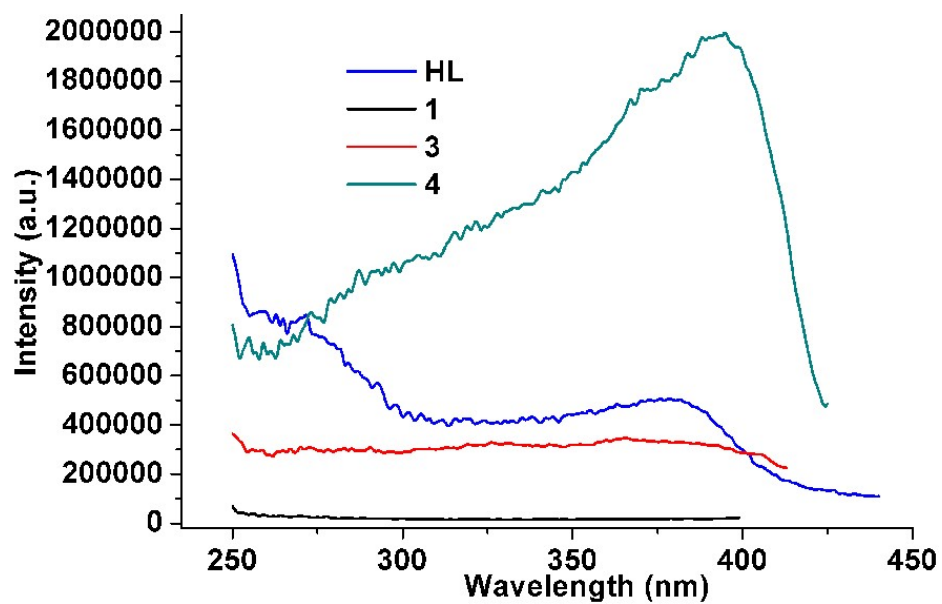

Fig. S11 Solid-state excitation spectra of HL ligand and coordination polymers.
